# Supplementary material for: Titania Nanotubes/Hydroxyapatite Nanocomposites Produced with the Use of the Atomic Layer Deposition Technique: Estimation of Bioactivity and Nanomechanical Properties
Source: MDPI journal article supplement (doi:10.3390/nano9010123), 2019-01-19
Supplement: s1 [file s1]

## *Supplementary Materials*

### **Titania Nanotubes/Hydroxyapatite Nanocomposites Produced with the use of the Atomic Layer Deposition Technique: Estimation of Bioactivity and Nanomechanical Properties**

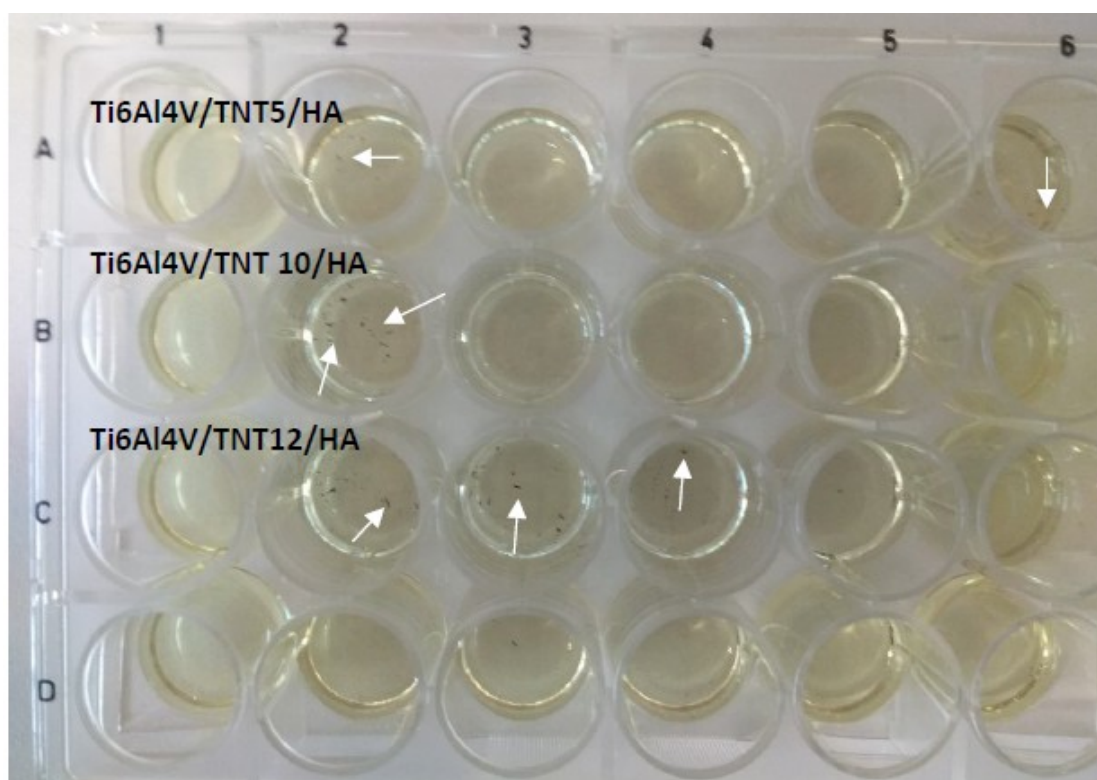

Figure S1. The formazan crystals in the culture medium (white arrows) formed during carrying out the MTT assay. Released formazan crystals indicate on the detachment of L929 cells from the surface of TiO<sub>2</sub> nanotubes covered with a hydroxyapatite, obtained during ALD process applying 500 cycles.
